# Supplementary material for: Immunomodulatory effects ofPseudostellaria heterophyllapeptide on spleen lymphocytesviaa Ca2+/CaN/NFATc1/IFN-γ pathway
Source: Royal Society of Chemistry journal article supplement (doi:10.1039/c9fo00577c), 2019-01-01
Supplement: c9fo00577c1.pdf [file c9fo00577c1.pdf]

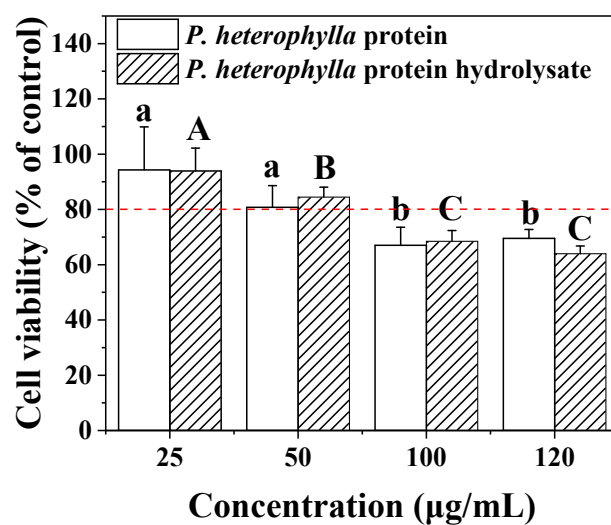

1

2 **Fig. S1 Cytotoxicities of *P. heterophylla* protein and *P. heterophylla* protein**

3 **hydrolysate in spleen lymphocytes.** Data are presented as the mean  $\pm$  SD (n = 3).

4 Different letters represent significant differences ( $p < 0.05$ ).
